# Supplementary figures and images for: Characterisation of the Stromal Microenvironment in Lobular Breast Cancer
Source: MDPI journal article supplement (doi:10.3390/cancers14040904), 2022-02-11

Figure 6B

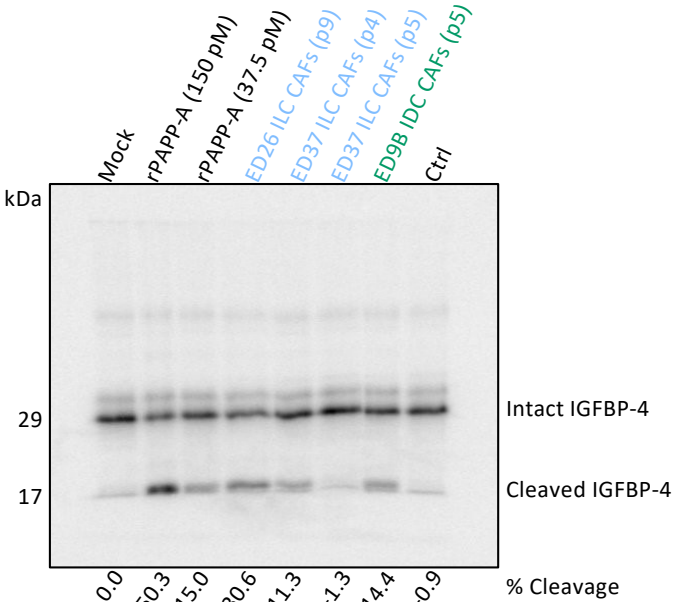

Figure 6c

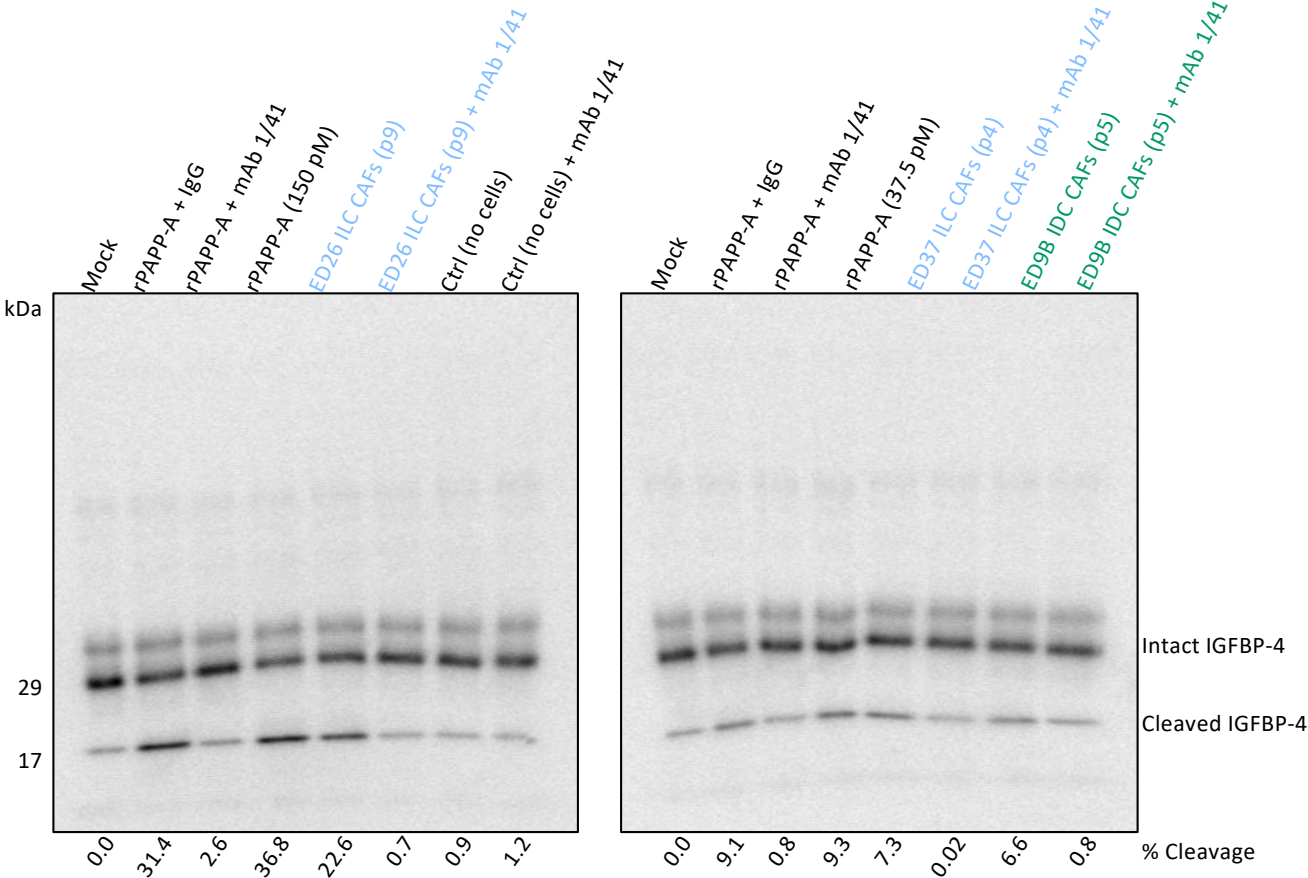

Supplement: s1 [file s1]
